# Supplementary material
Source: PubMed Central journal article supplement (PMC3644733)

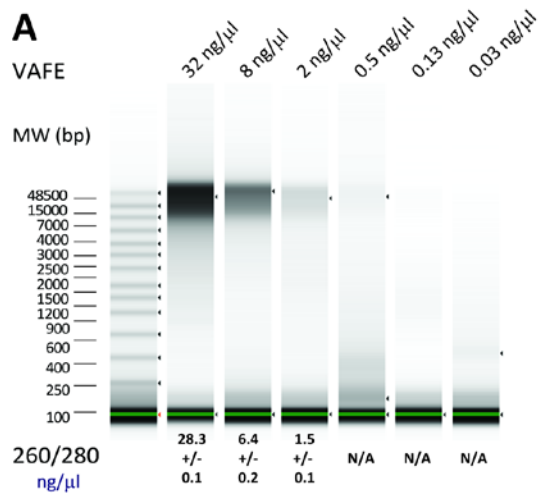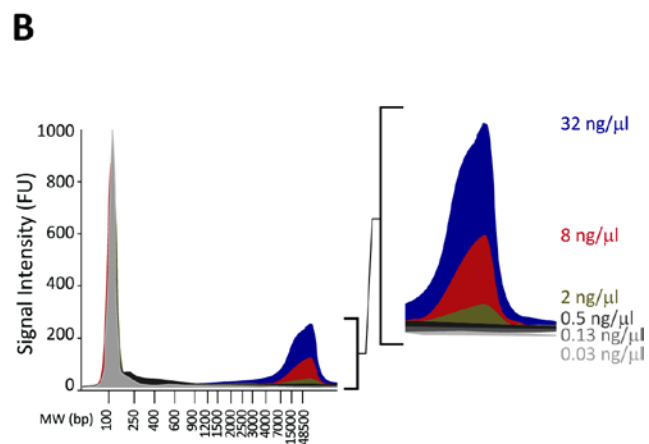

**SUPPLEMENTAL FIGURE 1**

Supplement: mmc1.pdf [file mmc1.pdf]

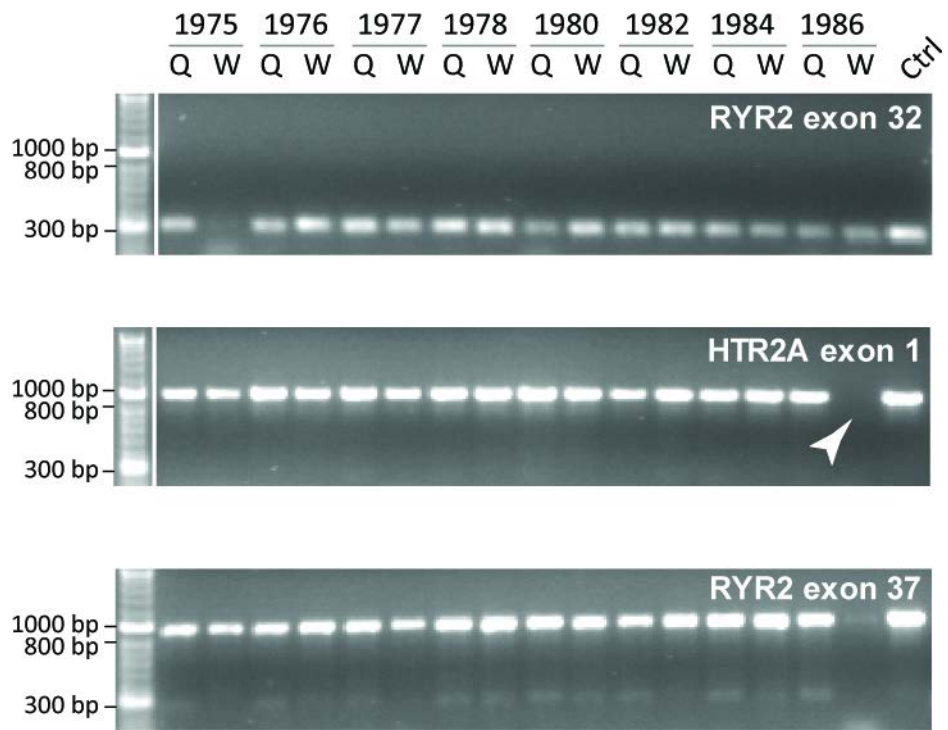

**SUPPLEMENTAL FIGURE 2**

Supplement: mmc2.pdf [file mmc2.pdf]

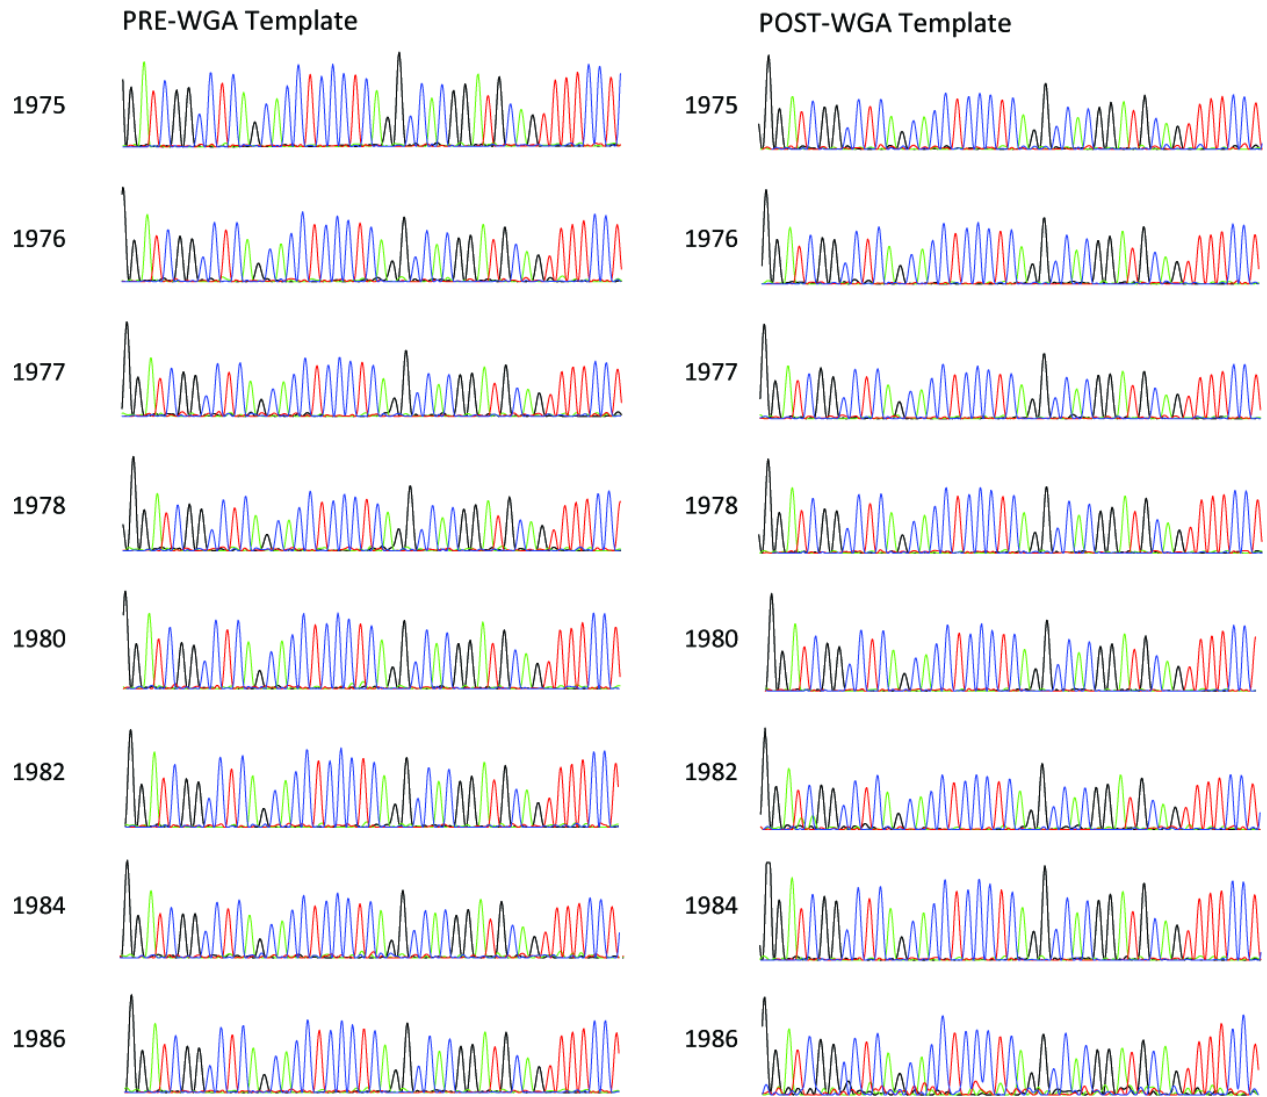

**SUPPLEMENTAL FIGURE 3**

Supplement: mmc3.pdf [file mmc3.pdf]

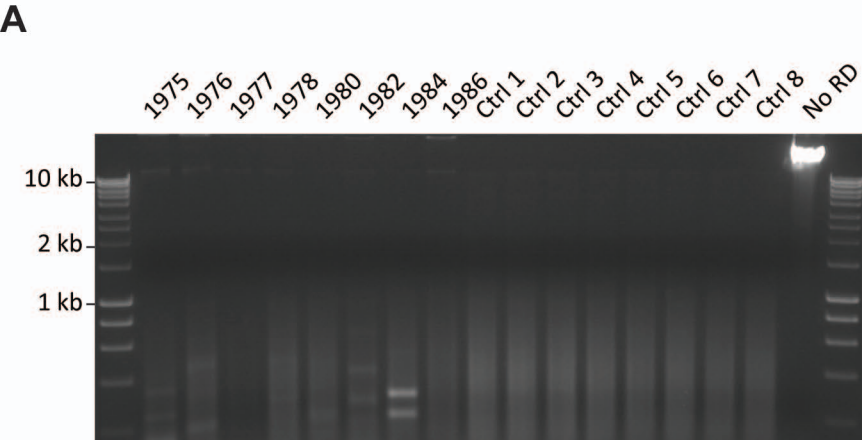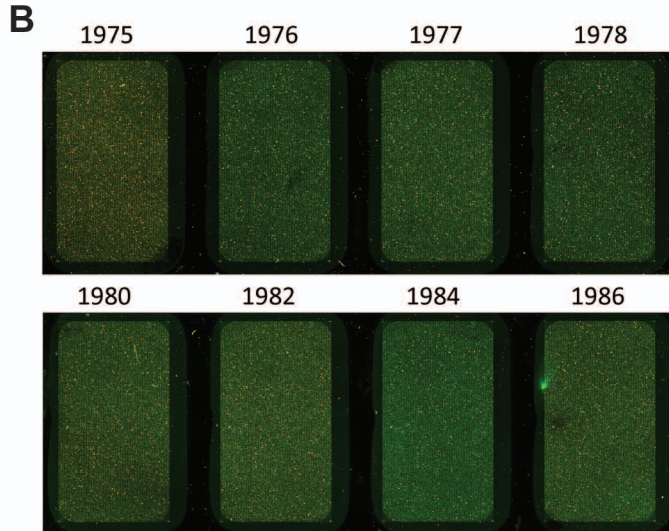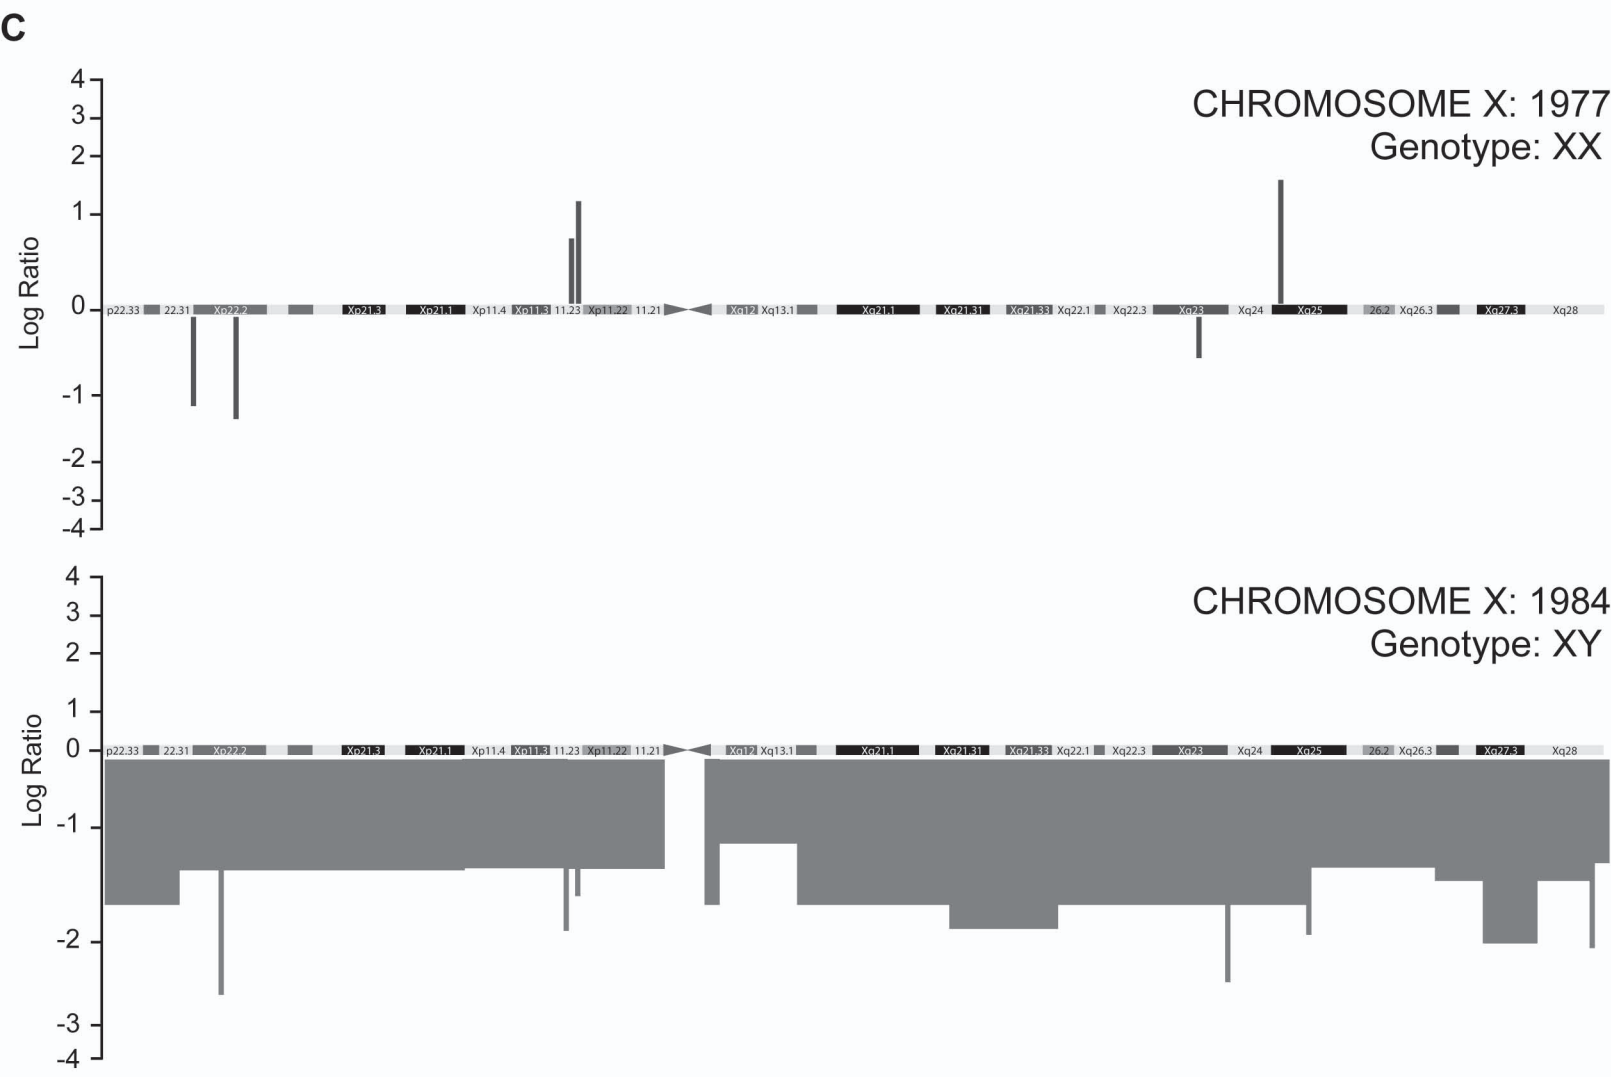

Supplement: mmc4.pdf [file mmc4.pdf]
